# Supplementary material
Source: publisher figshare collection journal article supplement (https://gsajournals.figshare.com/ndownloader/files/21823206)
Supplement: Supplementary file 1 [file 21823206]

## Sheet: Sheet1
Table S2. Power and False discovery proportion (FDP) for each simulation replicate when selecting the top-50 SNPs using LBR and SMR
Replicate	SNPs selected	LBR (SNP) thresholda	SMR thresholdb	LBR Power	LBR FDP	SMR Power	SMR FDP
1	50	0.762667	1.86235e-06	0.766667	0.08	0.5	0.4
2	50	0.732	3.68634e-08	0.7	0.16	0.466667	0.44
3	50	0.64	4.17047e-08	0.683333	0.18	0.4	0.52
4	50	0.891333	5.44209e-07	0.816667	0.02	0.583333	0.3
5	50	0.598	2.56657e-07	0.716667	0.14	0.383333	0.54
6	50	0.815333	2.43049e-08	0.8	0.04	0.416667	0.5
7	50	0.784	1.99637e-07	0.75	0.1	0.5	0.4
8	50	0.726667	4.35952e-09	0.766667	0.08	0.35	0.58
9	50	0.606	6.1409e-08	0.733333	0.12	0.433333	0.48
10	50	0.863333	1.05424e-08	0.766667	0.08	0.516667	0.38
11	50	0.803333	4.72933e-07	0.783333	0.06	0.5	0.4
12	50	0.7	1.18209e-08	0.75	0.1	0.466667	0.44
13	50	0.756	1.45708e-06	0.766667	0.08	0.466667	0.44
14	50	0.741333	3.09374e-06	0.733333	0.12	0.516667	0.38
15	50	0.580667	1.43066e-07	0.716667	0.14	0.533333	0.36
16	50	0.659333	2.02273e-07	0.733333	0.12	0.366667	0.56
17	50	0.846667	4.17626e-07	0.8	0.04	0.483333	0.42
18	50	0.700667	4.42654e-09	0.666667	0.2	0.366667	0.56
19	50	0.869333	3.2884e-08	0.766667	0.08	0.483333	0.42
20	50	0.697333	1.45155e-06	0.766667	0.08	0.5	0.4
21	50	0.731333	1.07364e-08	0.8	0.04	0.45	0.46
22	50	0.872667	1.18328e-07	0.816667	0.02	0.433333	0.48
23	50	0.742	9.1314e-09	0.783333	0.06	0.4	0.52
24	50	0.761333	7.08765e-08	0.733333	0.12	0.383333	0.54
25	50	0.731333	2.0353e-11	0.733333	0.12	0.25	0.7
26	50	0.776	2.16977e-07	0.75	0.1	0.516667	0.38
27	50	0.642	4.82869e-07	0.75	0.1	0.433333	0.48
28	50	0.764	3.13991e-09	0.733333	0.12	0.433333	0.48
29	50	0.660667	5.34901e-07	0.7	0.16	0.483333	0.42
30	50	0.809333	2.91948e-08	0.766667	0.08	0.433333	0.48
	AVERAGE	0.742156	3.9352e-07	0.751667	0.098	0.448333	0.462
	SD	0.0839709	6.96803e-07	0.0374856	0.0449828	0.0675729	0.0810874
	SE	0.0153309	1.27218e-07	0.00684391	0.00821269	0.0123371	0.0148045
	95% CI			[0.738 ; 0.765 ]	[0.082 ; 0.114 ]	[0.424 ; 0.473 ]	[0.433 ; 0.491 ]
a Metric for LBR (at the single SNP level) is PPDiffSNP
b Metric for SMR is pvalue-diff
